# Supplementary material
Source: PubMed Central journal article supplement (PMC4826716)
Supplement: NIHMS766261-supplement-Author_removal_statement_1.pdf [file NIHMS766261-supplement-Author_removal_statement_1.pdf]

I hereby certify, that I agree to be no longer listed as an author of the manuscript  
"Prospective evaluation of 18F-FDG uptake in post-ischemic myocardium by  
simultaneous PET/MRI as a predictor of functional outcome" submitted by Rischpler  
et al. to Circulation: Cardiovascular Imaging.

12.12.15

ZYME

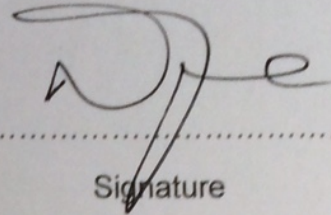A handwritten signature in black ink, appearing to be 'ZYME', written over a horizontal dotted line.

Date

Name

Signature
